# Supplementary material
Source: PubMed Central journal article supplement (PMC6108547)
Supplement: NIHMS1503489-supplement-1.pdf [file NIHMS1503489-supplement-1.pdf]

**Cell Reports, Volume 24**

**Supplemental Information**

**Ki67 is a Graded Rather than a Binary Marker  
of Proliferation versus Quiescence**

**Iain Miller, Mingwei Min, Chen Yang, Chengzhe Tian, Sara Gookin, Dylan  
Carter, and Sabrina L. Spencer**

### Figure S1. Ki67 levels across the cell cycle as measured by immunofluorescence, Related to Figure 1

(A) Density scatter plots of EdU incorporation (left),  $\alpha$ -phospho-Rb-S807/811 (middle), and  $\alpha$ -phospho-Histone H3 (right) vs. DNA content as measured by Hoechst. These stains were used in combination to determine cell-cycle phases in asynchronously cycling cells, indicated by labeled boxed areas, as described previously (Gookin et al., 2017). G0 phase:  $\sim 2N$  DNA content/phospho-Rb<sup>low</sup>/EdU<sup>low</sup>; G1 phase:  $2N$  DNA content/phospho-Rb<sup>high</sup>/EdU<sup>low</sup>; Early S phase:  $\sim 2N$  DNA content /EdU<sup>mid</sup>; S phase:  $2-4N$  DNA content/EdU<sup>high</sup>; Late S phase:  $\sim 4N$  DNA content/EdU<sup>mid</sup>; G2 phase:  $4N$  DNA content/EdU<sup>low</sup>/phospho-HH3<sup>low</sup> and M phase:  $\sim 4N$  DNA content/phospho-HH3<sup>high</sup>.

(B) Density scatter plot of  $\alpha$ -Ki67 signal vs DNA content (left) was converted into a contour plot (middle) using cell-cycle phase information obtained from (A). Probability densities of  $\alpha$ -Ki67 signal for cells in G0 and G1 phases were plotted from duplicate wells (right).

### Figure S2. Generation of an mCitrine-Ki67 knock-in line, Related to Figure 2-4

(A) Schematic of mCitrine-Ki67 knock-in process. 3.5% of cells were classified as mCitrine-positive by flow cytometry and sorted into single-cell clones (right).

(B) Expected sizes (left) and PCR products (right) of the wild-type *MKI67* gene and the Citrine-MKI67 fusion gene. Both alleles are tagged in the mCitrine-Ki67 knock-in cell line resulting in the absence of a wild-type band.

(C) mCitrine-Ki67 protein response to 32 hr of 100 nM MEK inhibitor is equivalent to wild-type Ki67, as assessed by western blot. Note that addition of the small mCitrine tag (26 kDa) to the large Ki67 protein (359 kDa) is not discernable by western blot.

(D) The  $\alpha$ -Ki67 signal linearly correlates with mCitrine fluorescence in the mCitrine-Ki67 knock-in line, but not in wild-type MCF10A cells that lack mCitrine. Treatment with 100nM MEK inhibitor for 32 hours resulted in a decrease in  $\alpha$ -Ki67 and mCitrine-Ki67 signals in the knock-in cell line. Note that x-axis units are arbitrary fluorescence units in natural log.

(E) Top: Live-cell, time-lapse images of a single mCitrine-Ki67 cell stably expressing Histone 2B-mTurquoise and mCherry-tagged CDK2 activity sensor, in various phases of the cell cycle. Bottom: Single-cell images of wild-type MCF10A cells fixed and stained with Hoechst and Ki67 antibody. Fixed cell-cycle phases were determined as in Figure S1A. The subcellular localization of mCitrine-Ki67 fusion protein is consistent with wild-type Ki67 protein localization in all cell-cycle phases.

(F) Corresponding single-cell CDK2 activity and Ki67 traces for the live-cell images shown in (E, Top); magenta circles on the Ki67 trace mark the time points shown in (E, Top). Dashed lines mark anaphase.

### Figure S3. Ki67 continuously decreases in G0/G1 and rises upon S phase entry, Related to Figure 2-3

(A) CDK2 activity and mCitrine-Ki67 traces for two individual MCF7 CDK2<sup>inc</sup> cells (top), CDK2<sup>emerge</sup> cells re-entering the cell cycle 10 hr after mitosis (middle), and CDK2<sup>low</sup> cells (bottom).

(B) Averaged single-cell MCF7 traces of CDK2 activity (top) or mCitrine-Ki67 (middle) computationally aligned to time of anaphase, for each group of cells indicated. Box plot quantifies Ki67 levels at the time CDK2 activity begins to rise (bottom).  $n = 13-500$ .

(C) MCF7 cells were perturbed with control medium change, serum withdrawal, CDK4/6 inhibition, or Nutlin addition. Averaged single-cell traces for CDK2 activity (left column) or mCitrine-Ki67 (right column) were computationally aligned to time of anaphase. Gray boxes indicate times of perturbation. Error bars represent standard error of the mean.  $n = 15$  for Control G0;  $n = 280-700$  for other conditions.

#### **Figure S4. Retrospective estimation of quiescence duration with IF images of Ki67, Related to Figure 2**

(A-B) Population fit of Ki67 degradation in CDK2<sup>low</sup> cells. Left: the logarithm (A) and the inverse (B) of the Ki67 signals are plotted against time since anaphase: average traces (red), 95% confidence intervals (red shades). The correlation coefficients of the fitted data are displayed in the upper right corner of the images. Right: Average Ki67 traces for CDK2<sup>low</sup> cells are plotted in red. The average trace is fit by 1<sup>st</sup> (A) or 2<sup>nd</sup> order (B) degradation laws and the fitted curves are plotted in black. Fitting was conducted by searching for the optimal Ki67 signal at 2 hr after anaphase,  $[Ki67](0)$ , and the kinetic rate constant,  $k_1$  or  $k_2$ , to minimize the Euclidean distance between the average Ki67 signals and fitted signals, normalized by the standard error of the mean (SEM) of the Ki67 signals at each time point.

(C) Population average estimation of quiescence durations using parameters inferred from MCF10A cells. Inference of Ki67 kinetic rate constants in MCF10A cells and prediction of quiescence durations with Ki67 IF images were performed as described in Methods. In each panel, each blue dot represents a CDK2<sup>low</sup> cell in the IF images, and the cell's measured (x-axis) and predicted (y-axis) quiescence durations are plotted. The red line represented the correct prediction where measured durations equal the predicted ones. The correlation coefficient (R) and the average Euclidean distance (Error, in hours) between the measured and predicted durations are displayed in the lower right corners. The model with MCF10A parameters shows predictive power for all four cell lines, suggesting that different cell lines follow similar Ki67 degradation kinetics.

(D) Normalized H2B signals at mitosis. The normalized H2B signal at mitosis of a cell is defined as its H2B signal at anaphase divided by its average H2B signal across all time points. The probability distributions of normalized H2B signals of all cells in a cell line were then estimated by nonparametric density estimation.

(E) Bayesian estimation of quiescence durations. The probability distribution of quiescence durations at a given Ki67 signal of CDK2<sup>low</sup> cells was computed as described in Methods. The 0.10, 0.25, 0.5, 0.75, 0.9 quantiles of the distribution are displayed in the figure. Each red dot represents a CDK2<sup>low</sup> cell in the IF images, and its Ki67 signal and measured quiescence duration are plotted on the x- and y-axes, respectively.

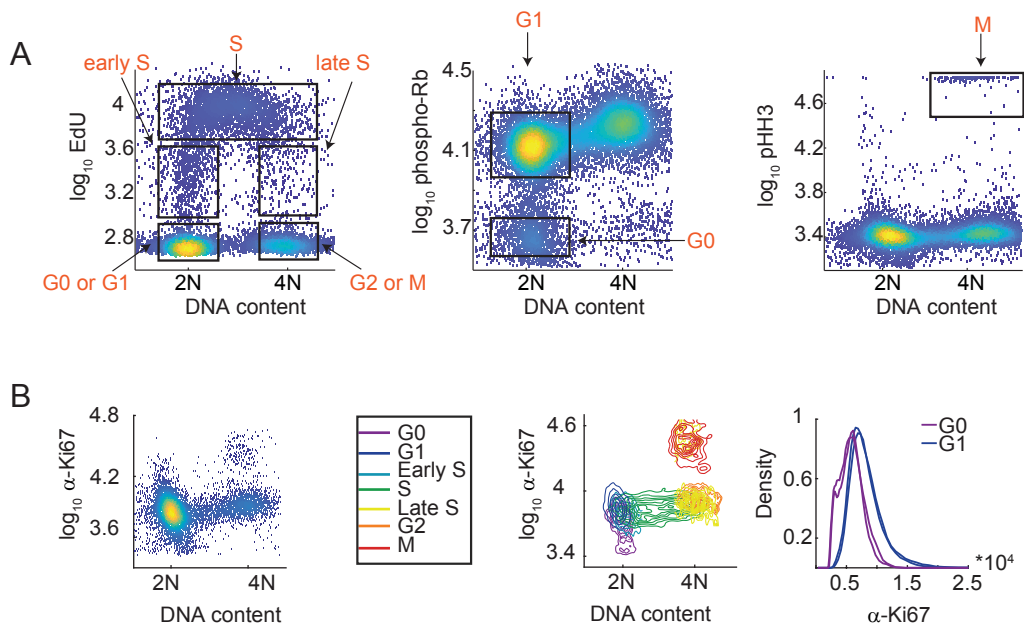

Figure S1

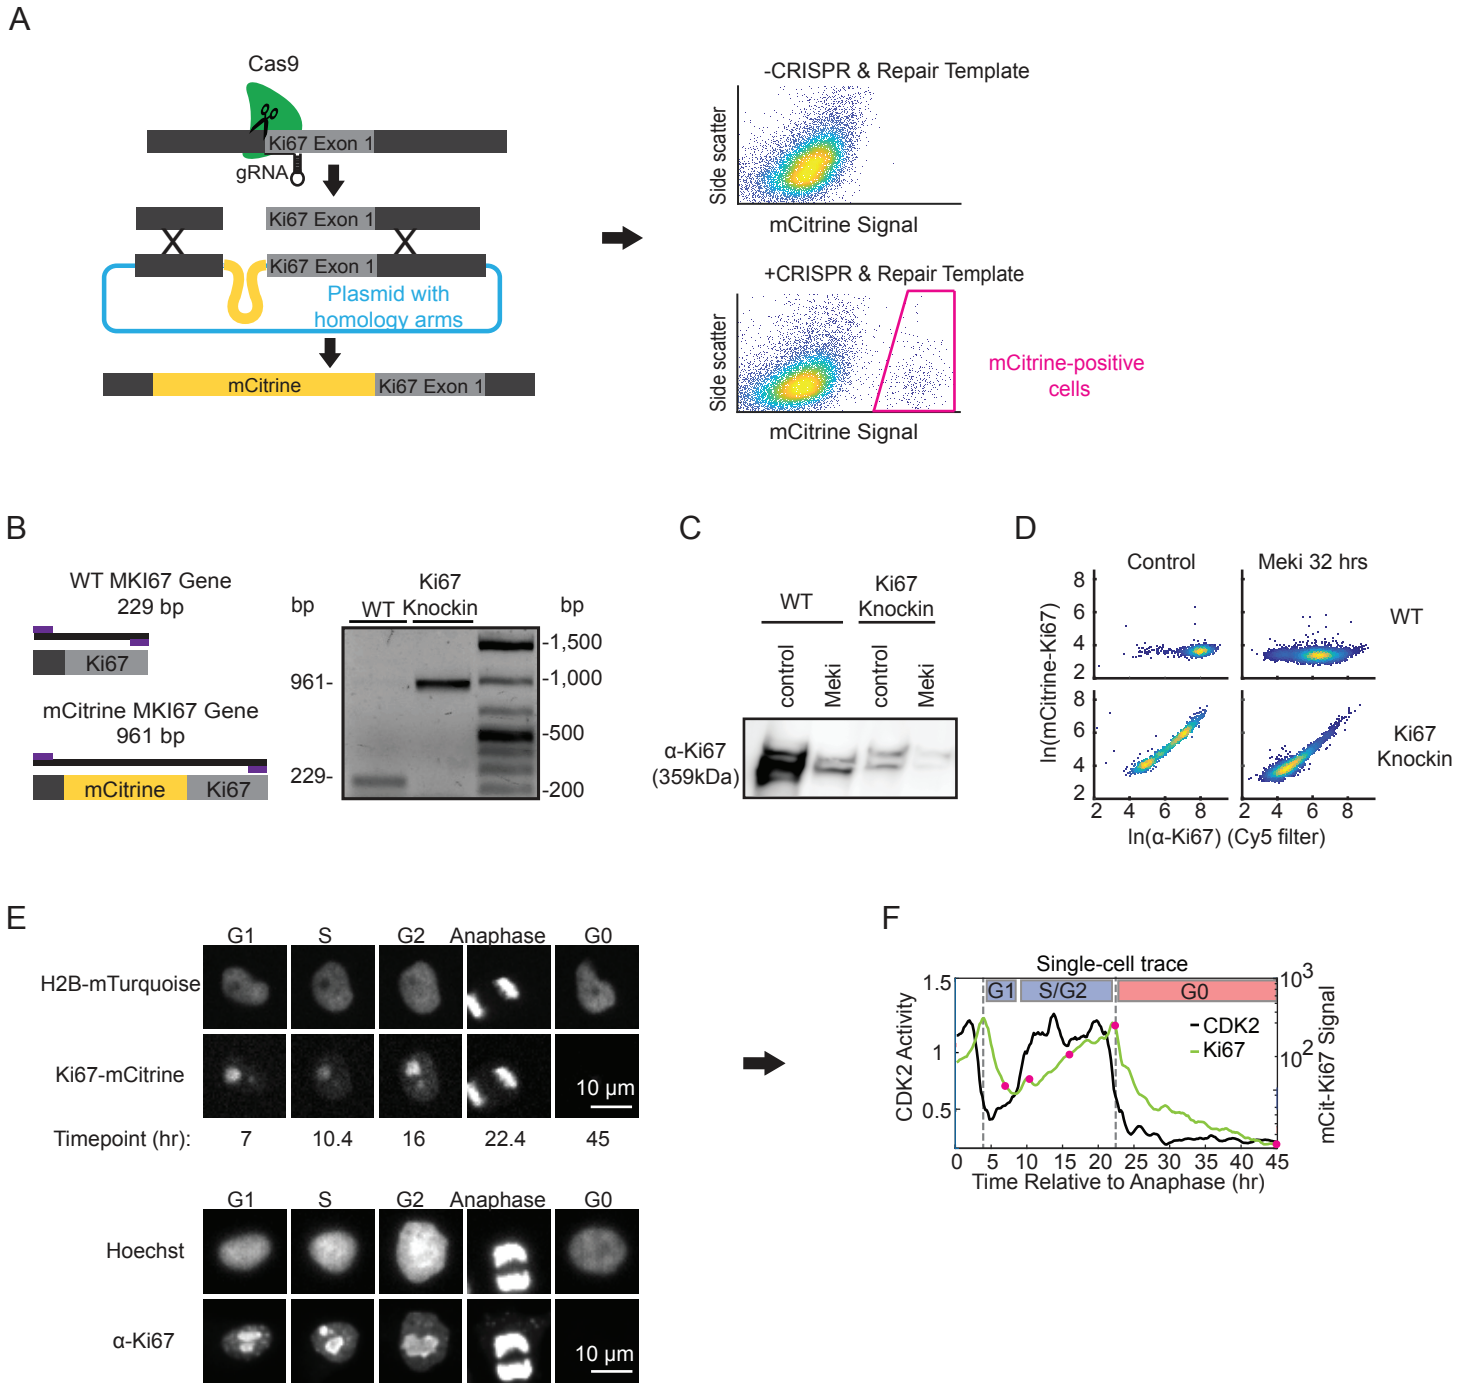

Figure S2

MCF7 cells

A

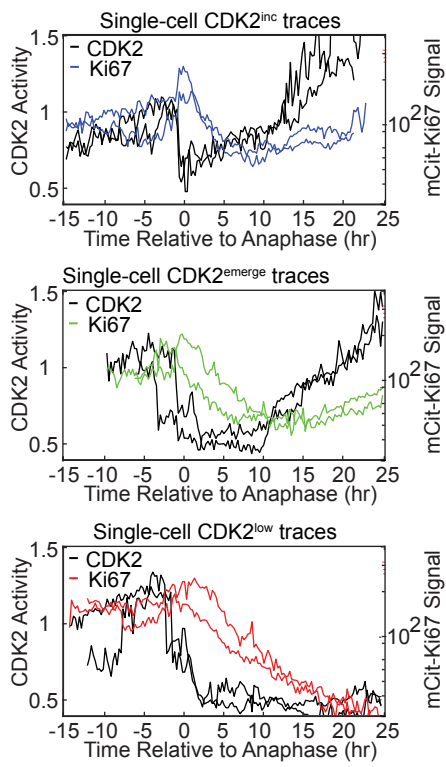

B

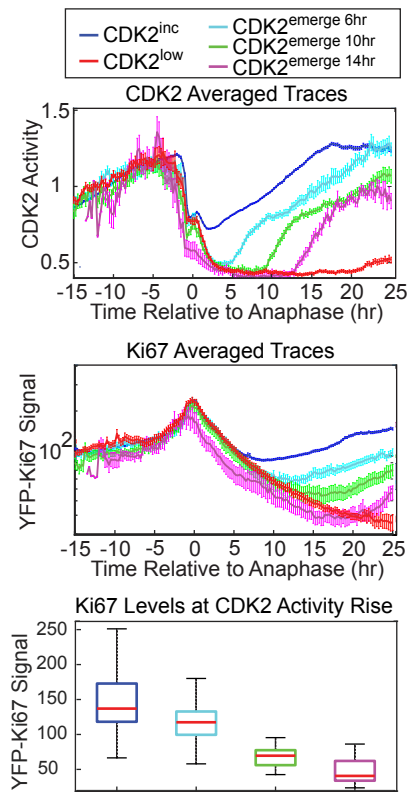

C

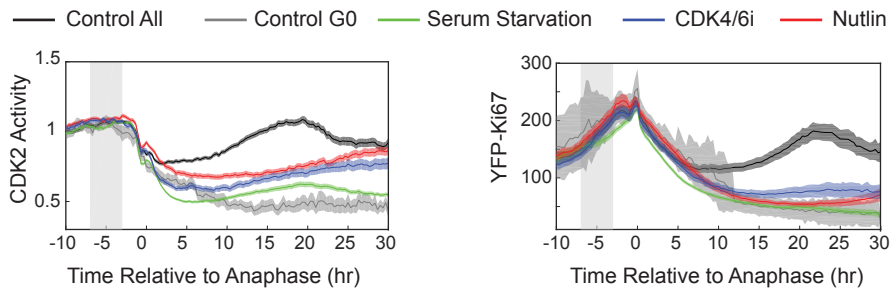

Figure S3

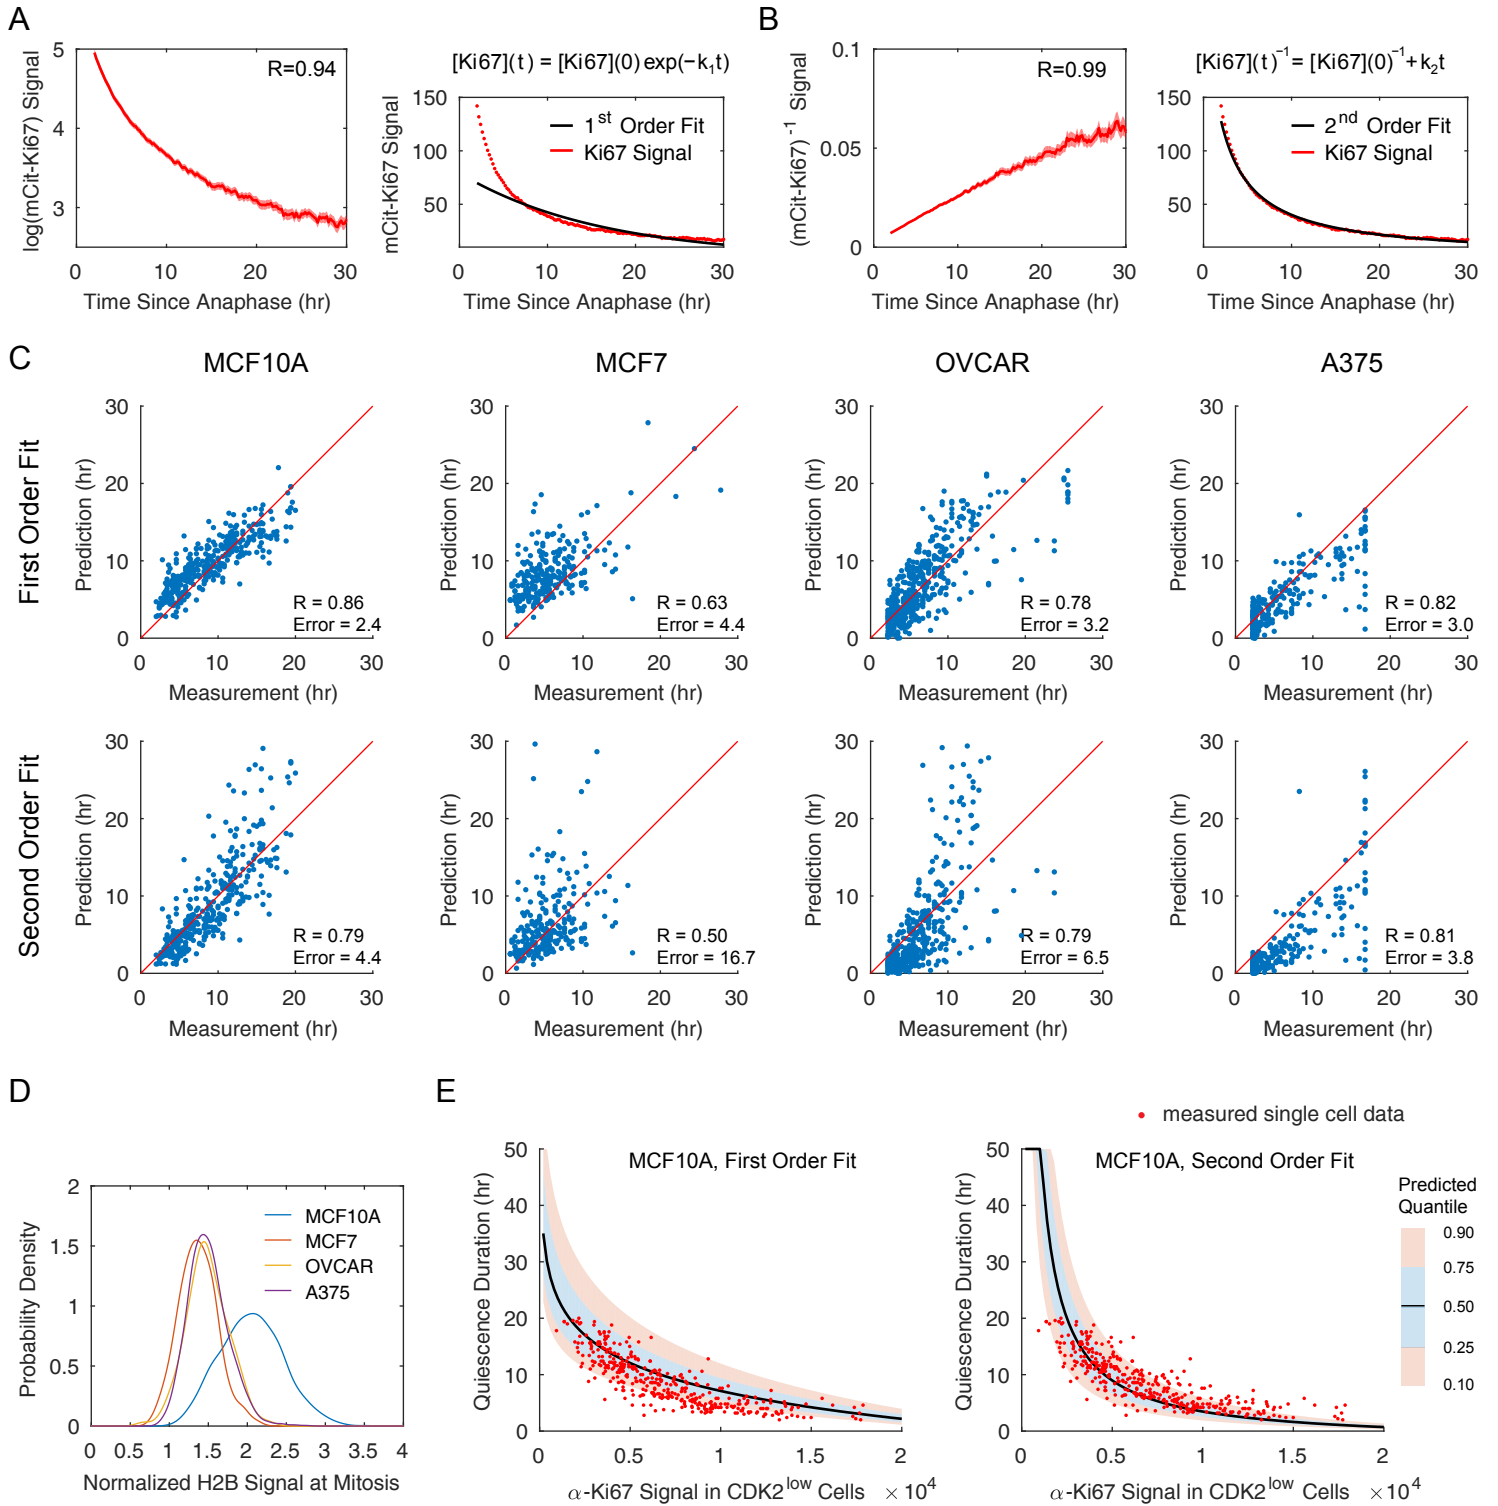

Figure S4

**Table S1. Definitions of cell populations in Figure 2 and Figure S3A-B**

|                                | MCF10A: CDK2 activity stayed between 1 and 1.5 between <b>a</b> to <b>b</b> hours after anaphase for at least 36 min, and remained below 0.8 from 3 to <b>c</b> hr after anaphase |          |          | MCF7: CDK2 activity stayed between 0.6 and 1.1 between <b>a</b> to <b>b</b> hours after anaphase for at least 2 hr, and remained below 0.6 from 3 to <b>c</b> hr after anaphase |          |          |
|--------------------------------|-----------------------------------------------------------------------------------------------------------------------------------------------------------------------------------|----------|----------|---------------------------------------------------------------------------------------------------------------------------------------------------------------------------------|----------|----------|
|                                | <b>a</b>                                                                                                                                                                          | <b>b</b> | <b>c</b> | <b>a</b>                                                                                                                                                                        | <b>b</b> | <b>c</b> |
| CDK2 <sup>inc</sup>            | 3                                                                                                                                                                                 | 5        | NA       | 3.5                                                                                                                                                                             | 7.5      | NA       |
| CDK2 <sup>emerging 6 hr</sup>  | 7                                                                                                                                                                                 | 9        | 7        | 5.5                                                                                                                                                                             | 8.5      | 5        |
| CDK2 <sup>emerging 10 hr</sup> | 11                                                                                                                                                                                | 13       | 11       | 9.5                                                                                                                                                                             | 14.5     | 9        |
| CDK2 <sup>emerging 14 hr</sup> | 15                                                                                                                                                                                | 17       | 15       | 13.5                                                                                                                                                                            | 18.5     | 13       |
| CDK2 <sup>low</sup>            | CDK2 activity values below 0.5 at 2 hr after mitosis and remain below the level seen at anaphase for the remainder of the imaging period                                          |          |          |                                                                                                                                                                                 |          |          |

NA - Not applicable



**Table S2. Definitions of cell populations in Figure 3 and Figure S3C**

|                        | MCF10A                                |         |                                                                                           | MCF7                                |               |
|------------------------|---------------------------------------|---------|-------------------------------------------------------------------------------------------|-------------------------------------|---------------|
|                        | time point tested (hr after anaphase) |         | CDK2 activity                                                                             | time period tested                  | CDK2 activity |
|                        | untreated                             | treated |                                                                                           |                                     |               |
| CDK2 <sup>inc</sup>    | 2                                     | 5       | >0.5                                                                                      | NA                                  | NA            |
| CDK2 <sup>emerge</sup> | 2                                     | 5       | <0.5, but increase later to above the level seen at anaphase                              | NA                                  | NA            |
| CDK2 <sup>low</sup>    | 2                                     | 5       | <0.5, and remain below the level seen at anaphase for the remainder of the imaging period | 6 hr after anaphase to end of movie | <0.9          |

NA - Not applicable
